# Supplementary material
Source: PubMed Central journal article supplement (PMC8034805)
Supplement: NIHMS1688245-supplement-Supporting_Information.pdf [file NIHMS1688245-supplement-Supporting_Information.pdf]

## **Supporting Information**

### **Enhancing Comprehensive Analysis of Secreted Glycoproteins from Cultured Cells Without Serum Starvation**

Suttipong Suttapitugsakul, Ming Tong, Fangxu Sun, and Ronghu Wu\*

School of Chemistry and Biochemistry and the Petit Institute for Bioengineering and Bioscience, Georgia Institute of Technology, Atlanta, Georgia 30332, USA

**A list of Supporting Tables in Excel format:**

**Table S1:** Deglycosylated peptides and glycoproteins detected from each potential source for signal boosting.

**Table S2:** Deglycosylated peptides and glycoproteins quantified from THP-1 monocytes treated with LPS

**Table S3:** Deglycosylated peptides and glycoproteins quantified from THP-1 M0 macrophages treated with LPS

**Table S4:** Deglycosylated peptides and glycoproteins quantified from Hep G2 cells treated with TGF- $\beta$

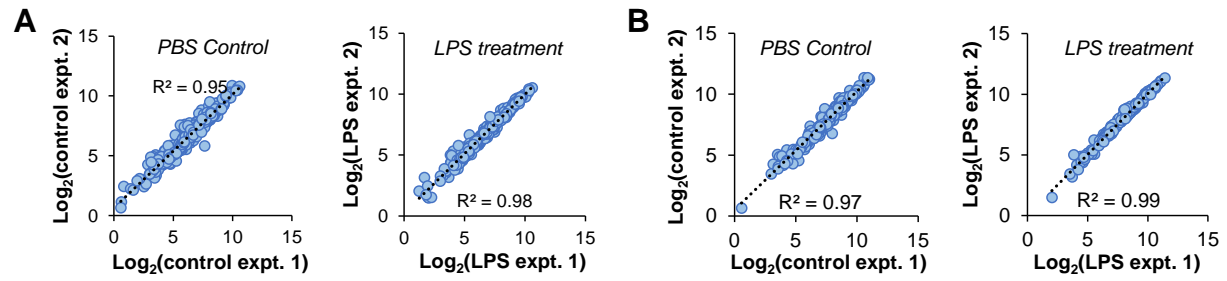

**Figure S1. Quantification of glycoproteins and deglycosylated peptides from THP-1 M0 macrophages treated with LPS.** Correlation of deglycosylated peptides (A) and glycoproteins (B) quantified from THP-1M0 macrophages.

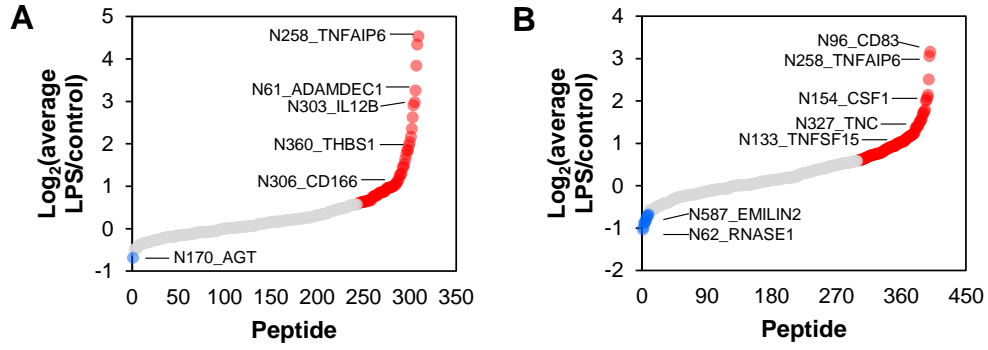

**Figure S2. Quantification deglycosylated peptides from THP-1 monocytes and M0 macrophages treated with LPS.** (A and B) Abundance changes at the deglycosylated peptide level from THP-1 monocytes (A) or M0 macrophages (B).
